# Supplementary material for: Associations Between Fetal Growth Trajectories and the Development of Myopia by 20 Years of Age
Source: PubMed Central journal article supplement (PMC7774062; doi:10.1167/iovs.61.14.26), 2020-12-23
Supplement: iovs-61-14-26_s002.pdf [file iovs-61-14-26_s002.pdf]

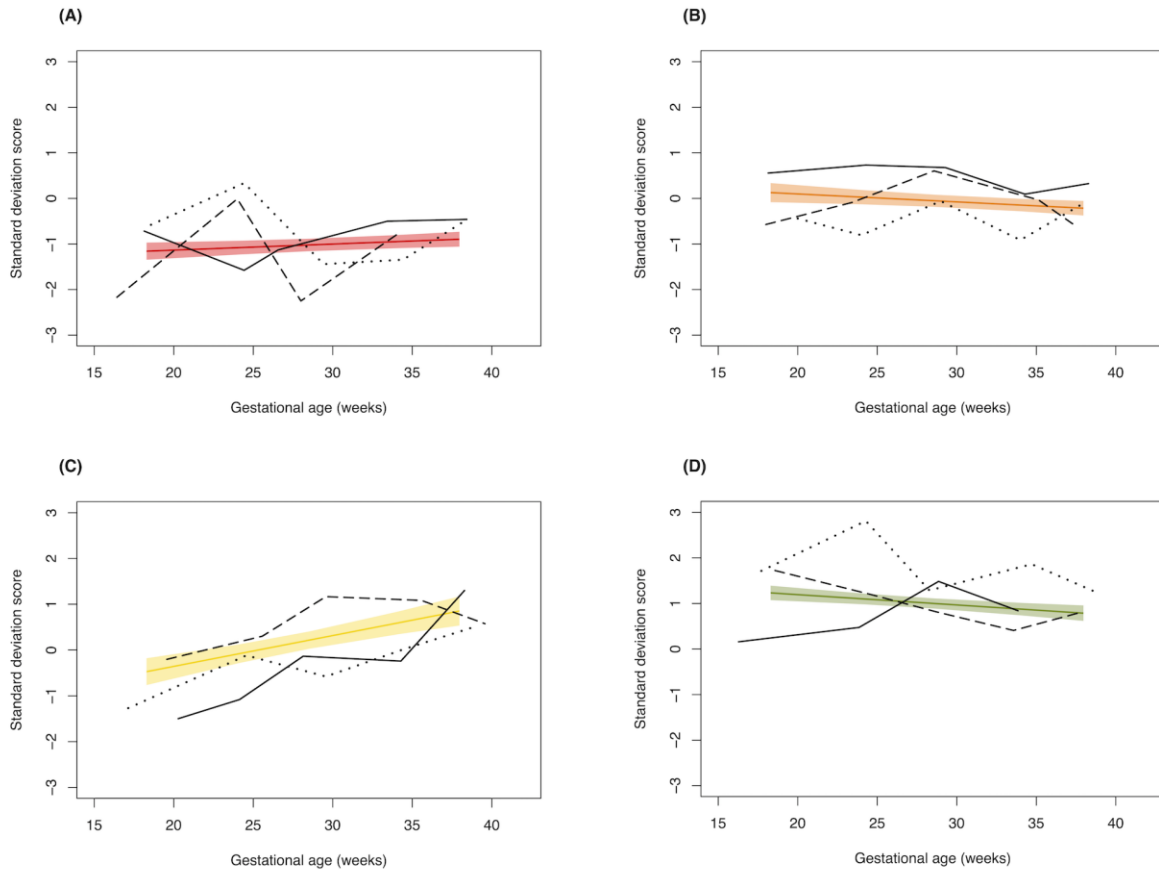

Supplementary Figure S2: Abdominal circumference trajectory model with individual profiles.

(A) "Small" trajectory group; (B) "medium" trajectory group; (C) "accelerated" trajectory group; and (D) "large" trajectory group from the abdominal circumference model. Each panel presents the trajectories of three randomly selected individuals (solid, dashed and dotted black lines) from the respective trajectory group, along with the estimated mean trajectory for the group with a 95% confidence interval.
